# Supplementary material
Source: publisher figshare collection journal article supplement (https://acs.figshare.com/ndownloader/files/3718483)
Supplement: Supplementary file 1 [file 3718483]

## Supporting Information

### Layer-by-layer polyelectrolyte assisted growth of 2D ultrathin MoS<sub>2</sub> nanosheets on various 1D carbons for superior Li-storage

Qunting Qu,<sup>a,1</sup> Feng Qian,<sup>a,1</sup> Siming Yang,<sup>a</sup> Tian Gao,<sup>a</sup> Weijie Liu,<sup>a</sup> Jie Shao,<sup>b,\*</sup> and  
Honghe Zheng<sup>a,\*</sup>

<sup>a</sup>College of Physics, Optoelectronics and Energy & Collaborative Innovation Center of Suzhou Nano Science and Technology, Soochow University, Suzhou, Jiangsu 215006, China

<sup>b</sup>College of Chemistry, Chemical Engineering and Material Science, Suzhou, Jiangsu 215006, China.

\*Corresponding author. E-mail: shaojie@suda.edu.cn; hhzheng@suda.edu.cn

#### **Supplementary experimental details**

*Characterization Methods:* SEM images were obtained using Hitachi S-8010 equipment operated at 15 kV. TEM images and EDX spectra were obtained using FEI Tecnai G-20 microscope. The ultrathin sections of 1D materials for TEM characterisation were obtained using Gatan 691 precision ion polishing system. XRD patterns were collected using PANalytical X'Pert PRO MRD diffractometer with Ni-filtered Cu K $\alpha$  radiation. TG analysis was carried out using a SEIKO TG/DTA 7300 thermal analyzer. Zeta potentials were measured by dispersing the samples in DMF/H<sub>2</sub>O mixture with a concentration of 1 mg mL<sup>-1</sup> using Zeta potential analyzer (Zetasizer Nano ZS-90, Malvern, UK).

*Electrochemical Testing:* The working electrode slurry was prepared by dispersing the active materials, Super P-Li, and poly(vinylidene fluoride) (PVDF) binder in N-methylpyrrolidone with a weight ratio of 7/2/1. The slurry was spread onto copper foil disks and dried in a vacuum oven at 120 °C overnight. The mass loading of electrode material on each copper disk (diameter: 13 mm) is about 1.5 mg, which equals to a mass density of 1.13 mg cm<sup>-2</sup>. Lithium foil as the counter electrode, 1.0 M LiPF<sub>6</sub> in ethyl carbonate/dimethyl carbonate (1:1 v/v ratio) as the electrolyte, and Celgard 2500 as the separator, were used to assemble CR2032 coin cells. Galvanostatic discharge and charge tests were performed with a cycle tester Land 2001 from LAND Electronic Co. The cut-off potential window during charge/discharge was set between 3.0 and 0.01 V. CV curves were obtained using a CHI 760D electrochemical workstation at the scan rate of 0.1 mV s<sup>-1</sup>.

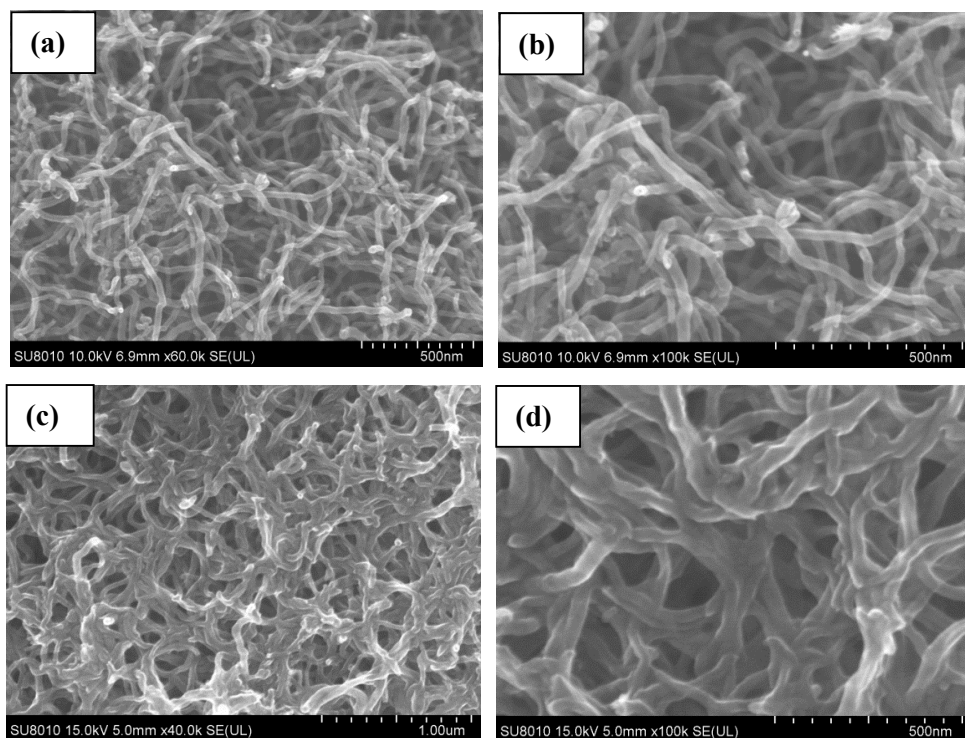

Figure S1 SEI images of (a,b) pristine CNTs and (c,d) PDDA/PSS/PDDA polyelectrolytes-coated CNTs at different magnifications.

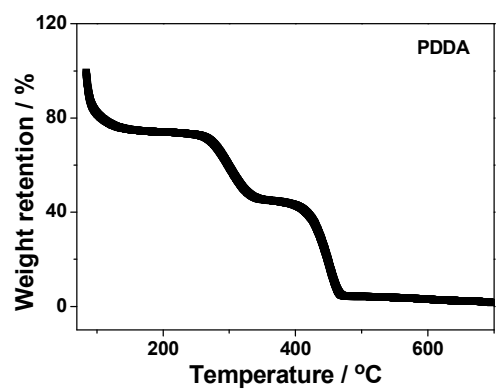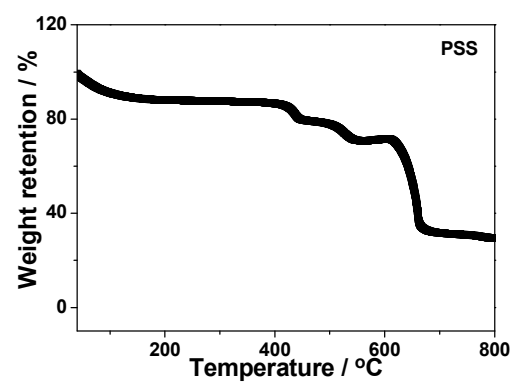

Figure S2 TG curves of pure PDDA and PSS under the atmosphere of Ar.

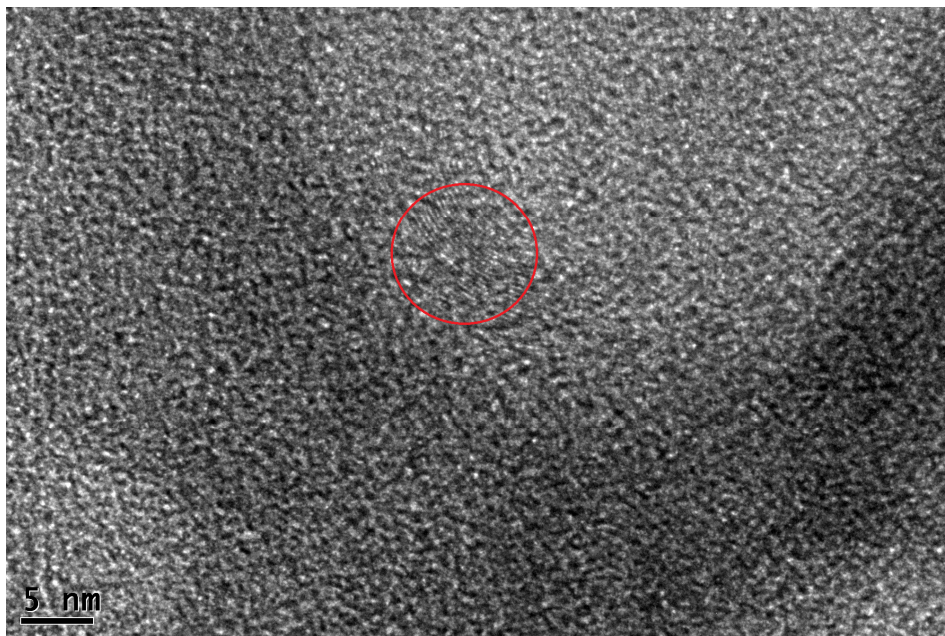

Figure S3 One high-resolution TEM image of CNTs@MoS<sub>2</sub> taken at the cross-section of CNTs@MoS<sub>2</sub>.

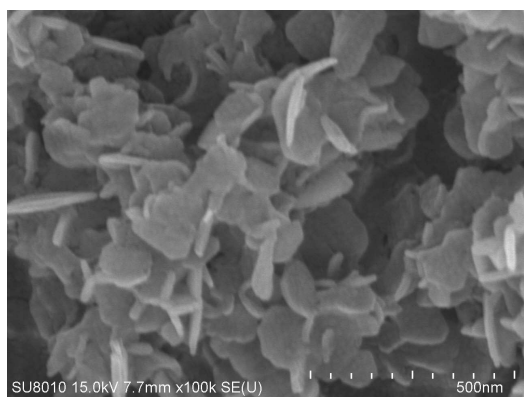

Figure S4 SEM image of bulk MoS<sub>2</sub>.

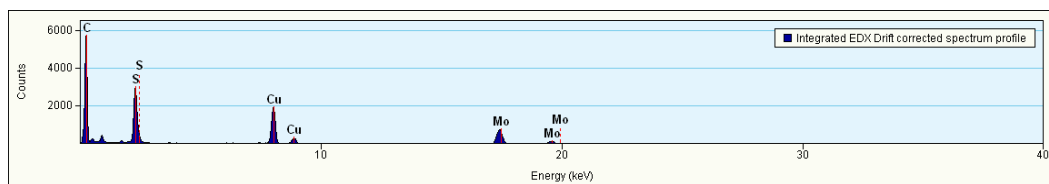

Figure S5 EDX elemental analysis of CNTs@MoS<sub>2</sub>.

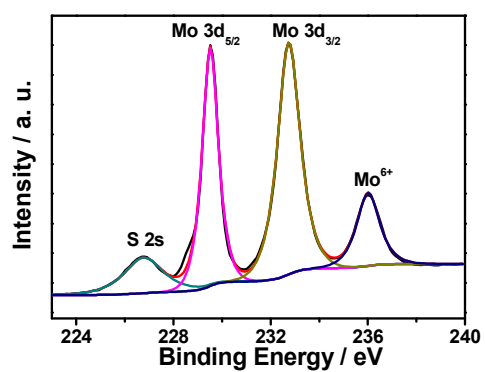

Figure S6 Deconvoluted XPS spectra of CNTs@MoS<sub>2</sub> in the core level region of Mo.

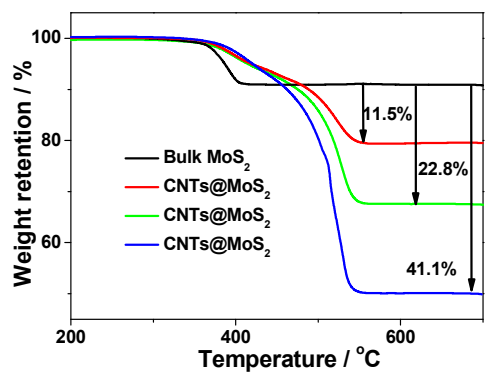

Figure S7 TG curves of CNTs@MoS<sub>2</sub> hybrids with different contents of MoS<sub>2</sub>, showing that the weight percentage of MoS<sub>2</sub> is 59%, 77%, and 88%, respectively.

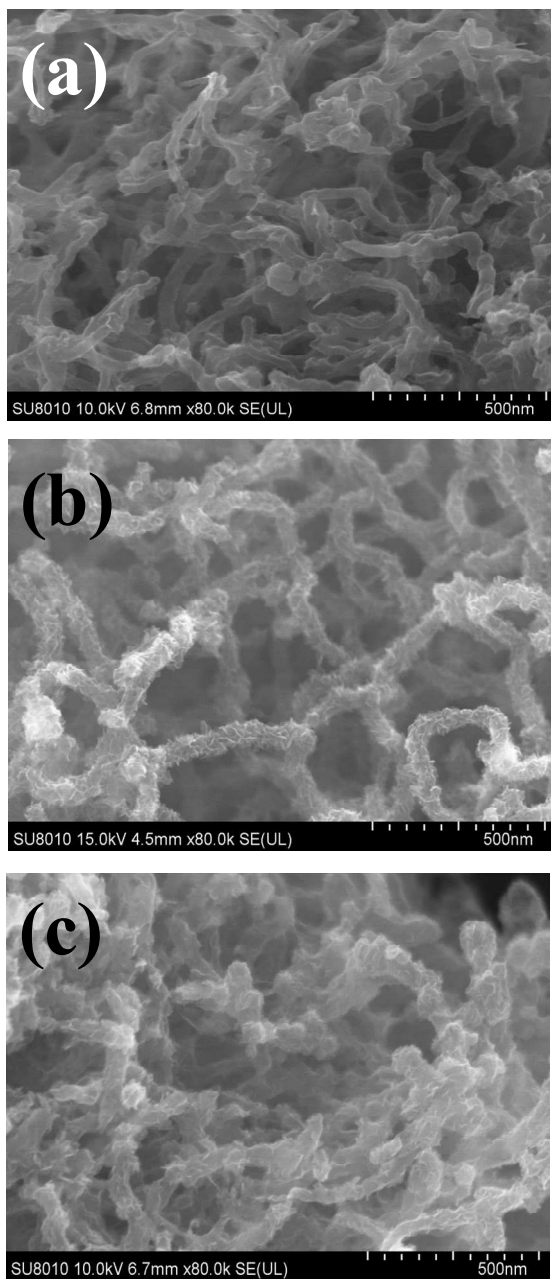

Figure S8 SEM images of CNTs@MoS<sub>2</sub> hybrids with different contents of MoS<sub>2</sub> (a) 59%, (b) 77%, (c) 88%.

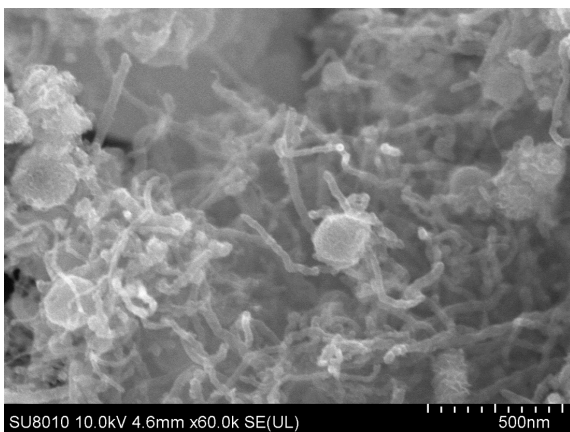

Figure S9 SEM image of CNTs/MoS<sub>2</sub> composite prepared with pristine CNTs.

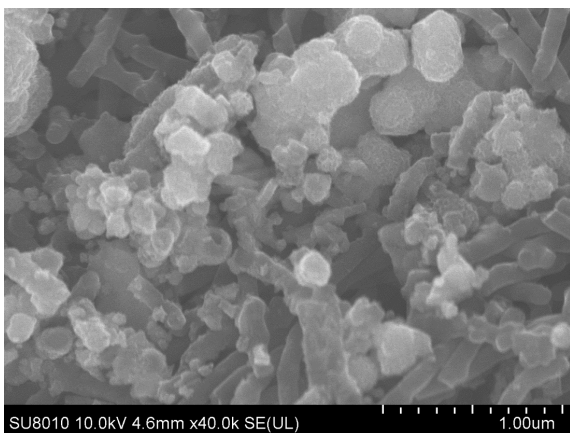

Figure S10 SEM image of CNFs/MoS<sub>2</sub> composite prepared without the assistance of polyelectrolyte.

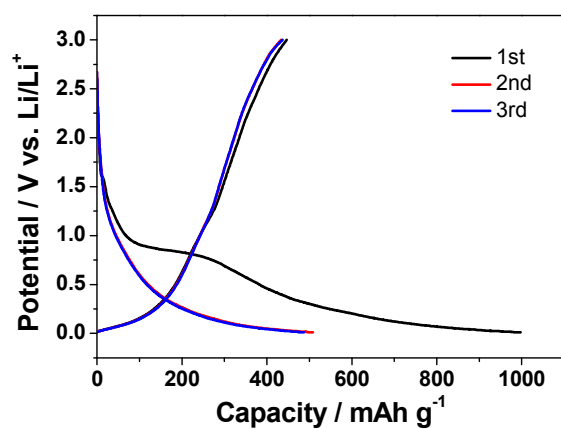

Figure 11 The initial three discharge/charge curves of pure CNTs at a current rate of 0.1 C (1C=372 mA g<sup>-1</sup>).

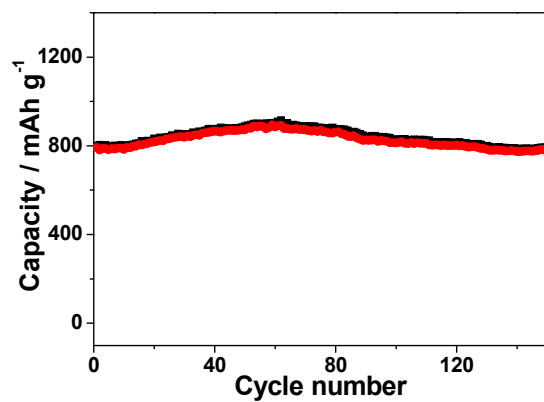

Figure S12 Capacity evolution of CNTs@MoS<sub>2</sub> at a constant rate of 1C.

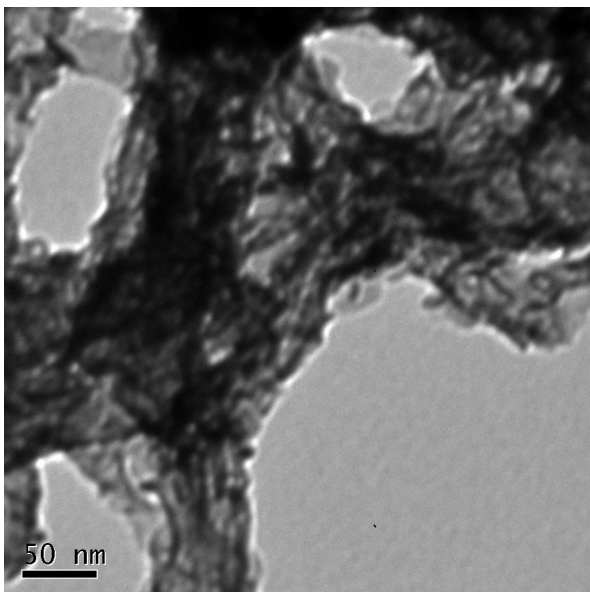

Figure S13 TEM image of CNTs/MoS<sub>2</sub> after 150 cycles.
